# Supplementary material for: Tamoxifen inhibits cell proliferation by impaired glucose metabolism in gallbladder cancer
Source: PubMed Central journal article supplement (PMC6991689; doi:10.1111/jcmm.14851), 2019-11-28
Supplement: JCMM-24-1599-s009.pdf [file JCMM-24-1599-s009.pdf]

| No. | Gender | Age | Hormonal therapy   | Menopause | Contraceptive pills | Treatment choice |
|-----|--------|-----|--------------------|-----------|---------------------|------------------|
| 1   | Female | 53  | /                  | ✓         | /                   | Surgery          |
| 2   | Male   | 77  | /                  | /         | /                   | /                |
| 3   | Male   | 51  | /                  | /         | /                   | Surgery          |
| 4   | Female | 75  | /                  | ✓         | /                   | /                |
| 5   | Male   | 68  | /                  | /         | /                   | Surgery          |
| 6   | Female | 51  | /                  | /         | /                   | Surgery          |
| 7   | Female | 68  | /                  | ✓         | /                   | /                |
| 8   | Male   | 70  | /                  | /         | /                   | Surgery          |
| 9   | Female | 66  | /                  | ✓         | /                   | Surgery          |
| 10  | Female | 55  | /                  | /         | /                   | /                |
| 11  | Female | 42  | /                  | /         | ✓                   | Surgery          |
| 12  | Female | 51  | /                  | /         | /                   | Surgery          |
| 13  | Female | 69  | /                  | ✓         | /                   | Surgery          |
| 14  | Female | 64  | /                  | ✓         | /                   | Surgery          |
| 15  | Male   | 61  | /                  | /         | /                   | Surgery          |
| 16  | Female | 79  | /                  | ✓         | /                   | Surgery          |
| 17  | Female | 54  | /                  | ✓         | /                   | /                |
| 18  | Female | 51  | Estradiol Valerate | ✓         | /                   | Surgery          |
| 19  | Female | 91  | /                  | ✓         | /                   | Surgery          |
| 20  | Female | 57  | /                  | ✓         | /                   | Surgery          |
| 21  | Female | 70  | /                  | ✓         | /                   | Surgery          |
| 22  | Male   | 74  | /                  | /         | /                   | /                |
| 23  | Male   | 83  | /                  | /         | /                   | Surgery          |
| 24  | Female | 73  | /                  | ✓         | /                   | Surgery          |
| 25  | Male   | 79  | /                  | /         | /                   | /                |
| 26  | Female | 50  | /                  | /         | /                   | Surgery          |
| 27  | Male   | 71  | /                  | /         | /                   | Surgery          |
| 28  | Female | 58  | /                  | ✓         | /                   | Surgery          |
| 29  | Male   | 59  | /                  | /         | /                   | Surgery          |
| 30  | Male   | 69  | /                  | /         | /                   | Surgery          |
| 31  | Male   | 67  | /                  | /         | /                   | /                |
| 32  | Female | 84  | /                  | ✓         | /                   | Surgery          |
| 33  | Male   | 75  | /                  | /         | /                   | Surgery          |
| 34  | Female | 52  | /                  | /         | /                   | /                |
| 35  | Female | 55  | /                  | /         | /                   | Surgery          |
| 36  | Female | 68  | /                  | ✓         | /                   | Surgery          |
| 37  | Female | 42  | /                  | /         | /                   | /                |
| 38  | Male   | 79  | /                  | /         | /                   | Surgery          |
| 39  | Female | 64  | /                  | ✓         | /                   | Surgery          |
| 40  | Male   | 80  | /                  | /         | /                   | Surgery          |
| 41  | Male   | 59  | /                  | /         | /                   | /                |
| 42  | Male   | 62  | /                  | /         | /                   | Chemotherapy     |
| 43  | Male   | 48  | /                  | /         | /                   | /                |
| 44  | Female | 49  | /                  | /         | /                   | Surgery          |
| 45  | Female | 58  | /                  | ✓         | /                   | Surgery          |
| 46  | Female | 48  | /                  | /         | /                   | Surgery          |
| 47  | Female | 74  | /                  | ✓         | /                   | Surgery          |
| 48  | Male   | 50  | /                  | /         | /                   | Surgery          |
| 49  | Female | 44  | /                  | /         | ✓                   | Surgery          |

|           |                             |   |   |                    |
|-----------|-----------------------------|---|---|--------------------|
| 50 Female | 64 /                        | ✓ | / | /                  |
| 51 Female | 51 /                        |   | / | /                  |
| 52 Female | 77 /                        | ✓ | / | Surgery            |
| 53 Female | 76 /                        | ✓ | / | Surgery            |
| 54 Male   | 65 DES for prostatic cancer | / | / | Surgery            |
| 55 Female | 71 /                        | ✓ | / | Surgery            |
| 56 Female | 76 /                        | ✓ | / | Surgery            |
| 57 Female | 62 /                        | ✓ | / | /                  |
| 58 Female | 75 /                        | ✓ | / | Surgery            |
| 59 Male   | 75 /                        | / | / | Surgery            |
| 60 Female | 83 /                        | ✓ | / | Surgery            |
| 61 Female | 65 /                        | ✓ | / | Surgery            |
| 62 Female | 75 /                        | ✓ | / | Surgery            |
| 63 Female | 72 /                        | ✓ | / | Surgery            |
| 64 Male   | 55 /                        | / | / | Surgery            |
| 65 Male   | 64 /                        | / | / | Chemotherapy       |
| 66 Male   | 62 /                        | / | / | Surgery            |
| 67 Male   | 52 /                        | / | / | /                  |
| 68 Male   | 60 /                        | / | / | Surgery            |
| 69 Male   | 55 /                        | / | / | /                  |
| 70 Male   | 63 /                        | / | / | Surgery            |
| 71 Male   | 58 /                        | / | / | /                  |
| 72 Female | 78 /                        | ✓ | / | Surgery            |
| 73 Female | 57 /                        |   | / | Surgery            |
| 74 Female | 61 /                        | ✓ | / | Surgery            |
| 75 Male   | 61 /                        | / | / | Surgery            |
| 76 Male   | 61 /                        | / | / | Chemo/Radiotherapy |
| 77 Male   | 64 /                        | / | / | Surgery            |
| 78 Male   | 38 DES after circumcision   | / | / | /                  |
| 79 Male   | 58 /                        | / | / | Surgery            |
| 80 Male   | 63 /                        | / | / | /                  |
| 81 Male   | 69 /                        | / | / | Chemotherapy       |
| 82 Male   | 75 /                        | / | / | /                  |
| 83 Female | 44 /                        |   | / | Surgery            |
| 84 Female | 78 /                        | ✓ | / | Surgery            |
| 85 Male   | 85 /                        | / | / | /                  |
| 86 Male   | 72 /                        | / | / | Radiotherapy       |
| 87 Male   | 69 /                        | / | / | /                  |
| 88 Female | 80 /                        | ✓ | / | Surgery            |
| 89 Female | 72 /                        | ✓ | / | Surgery            |
| 90 Male   | 62 /                        | / | / | Surgery            |
| 91 Female | 72 /                        | ✓ | / | Surgery            |
| 92 Male   | 82 /                        | / | / | /                  |
| 93 Male   | 73 /                        | / | / | Surgery            |
| 94 Male   | 71 /                        | / | / | Surgery            |
| 95 Male   | 69 /                        | / | / | /                  |
| 96 Male   | 75 /                        | / | / | Surgery            |
| 97 Male   | 65 /                        | / | / | /                  |
| 98 Male   | 74 /                        | / | / | Surgery            |
| 99 Male   | 78 /                        | / | / | /                  |

|            |                           |   |   |              |
|------------|---------------------------|---|---|--------------|
| 100 Male   | 79 /                      | / | / | Surgery      |
| 101 Male   | 81 /                      | / | / | Radiotherapy |
| 102 Male   | 68 /                      | / | / | /            |
| 103 Female | 49 /                      |   | / | Surgery      |
| 104 Female | 64 /                      | ✓ | / | Surgery      |
| 105 Male   | 62 /                      | / | / | Surgery      |
| 106 Female | 65 /                      | ✓ | / | Surgery      |
| 107 Male   | 50 /                      | / | / | Surgery      |
| 108 Male   | 72 /                      | / | / | /            |
| 109 Male   | 77 /                      | / | / | Surgery      |
| 110 Male   | 66 /                      | / | / | /            |
| 111 Male   | 69 /                      | / | / | Surgery      |
| 112 Male   | 71 /                      | / | / | /            |
| 113 Male   | 79 /                      | / | / | Surgery      |
| 114 Male   | 67 /                      | / | / | /            |
| 115 Male   | 80 /                      | / | / | Surgery      |
| 116 Male   | 68 /                      | / | / | Surgery      |
| 117 Male   | 61 /                      | / | / | Surgery      |
| 118 Female | 51 /                      |   | / | /            |
| 119 Female | 51 Estradiol Valerate     | ✓ | / | Surgery      |
| 120 Female | 50 /                      |   | / | /            |
| 121 Female | 53 /                      |   | / | Surgery      |
| 122 Female | 55 Estradiol Valerate     | ✓ | / | Chemotherapy |
| 123 Female | 54 /                      |   | / | Surgery      |
| 124 Female | 49 /                      |   | / | /            |
| 125 Female | 52 /                      |   | / | Surgery      |
| 126 Female | 50 /                      |   | / | Surgery      |
| 127 Female | 58 /                      | ✓ | / | /            |
| 128 Female | 48 /                      |   | / | Surgery      |
| 129 Female | 44 /                      |   | / | /            |
| 130 Female | 61 /                      | ✓ | / | Surgery      |
| 131 Female | 54 /                      |   | / | /            |
| 132 Female | 57 /                      | ✓ | / | Surgery      |
| 133 Female | 49 /                      |   | / | /            |
| 134 Female | 52 /                      |   | / | Chemotherapy |
| 135 Female | 41 /                      |   | / | /            |
| 136 Female | 66 /                      | ✓ | / | Surgery      |
| 137 Female | 83 /                      | ✓ | / | Surgery      |
| 138 Female | 63 /                      | ✓ | / | /            |
| 139 Male   | 72 /                      | / | / | Surgery      |
| 140 Female | 41 /                      |   | / | Surgery      |
| 141 Female | 63 /                      | ✓ | / | Surgery      |
| 142 Male   | 47 DES after circumcision | / | / | Surgery      |
| 143 Female | 83 /                      | ✓ | / | Surgery      |
| 144 Female | 83 /                      | ✓ | / | Surgery      |
| 145 Female | 49 /                      |   | / | /            |
| 146 Female | 48 /                      |   | / | Surgery      |
| 147 Female | 52 /                      |   | / | /            |
| 148 Female | 61 /                      | ✓ | / | Surgery      |
| 149 Female | 60 /                      | ✓ | / | /            |

|            |                           |   |   |              |
|------------|---------------------------|---|---|--------------|
| 150 Female | 58 /                      | ✓ | / | Surgery      |
| 151 Female | 44 /                      |   | / | /            |
| 152 Female | 49 /                      |   | / | Surgery      |
| 153 Female | 46 /                      |   | / | Surgery      |
| 154 Female | 38 /                      |   | / | /            |
| 155 Female | 42 /                      |   | / | Surgery      |
| 156 Female | 51 /                      |   | / | /            |
| 157 Female | 62 /                      | ✓ | / | Surgery      |
| 158 Female | 79 /                      | ✓ | / | Surgery      |
| 159 Female | 71 /                      | ✓ | / | Surgery      |
| 160 Female | 65 /                      | ✓ | / | Surgery      |
| 161 Male   | 63 /                      | / | / | Surgery      |
| 162 Female | 80 /                      | ✓ | / | Surgery      |
| 163 Female | 49 /                      |   | / | Surgery      |
| 164 Female | 75 /                      | ✓ | / | Surgery      |
| 165 Female | 70 /                      | ✓ | / | Surgery      |
| 166 Male   | 33 DES after circumcision | / | / | Surgery      |
| 167 Female | 71 /                      | ✓ | / | Surgery      |
| 168 Female | 56 /                      | ✓ | / | Surgery      |
| 169 Female | 72 /                      | ✓ | / | Surgery      |
| 170 Female | 46 /                      |   | / | /            |
| 171 Female | 49 /                      |   | / | Surgery      |
| 172 Female | 47 /                      |   | / | /            |
| 173 Female | 54 /                      |   | / | Chemotherapy |
| 174 Female | 53 /                      |   | / | /            |
| 175 Female | 68 /                      | ✓ | / | Surgery      |
| 176 Female | 57 /                      | ✓ | / | Surgery      |
| 177 Female | 75 /                      | ✓ | / | Surgery      |
| 178 Female | 49 /                      |   | / | Surgery      |
| 179 Female | 58 /                      | ✓ | / | /            |
| 180 Female | 41 /                      |   | / | Surgery      |
| 181 Female | 52 Estradiol Valerate     | ✓ | / | /            |
| 182 Female | 44 /                      |   | / | Surgery      |
| 183 Female | 54 /                      |   | / | Chemotherapy |
| 184 Female | 50 /                      |   | / | Surgery      |
| 185 Female | 64 /                      | ✓ | / | /            |
| 186 Female | 43 /                      |   | / | Surgery      |
| 187 Female | 55 /                      |   | / | Surgery      |
| 188 Female | 67 /                      | ✓ | / | /            |
| 189 Male   | 73 /                      | / | / | Surgery      |
| 190 Female | 79 /                      | ✓ | / | Surgery      |
| 191 Female | 54 /                      | ✓ | / | Surgery      |
| 192 Female | 81 /                      | ✓ | / | Surgery      |
| 193 Female | 77 /                      | ✓ | / | /            |
| 194 Male   | 65 /                      | / | / | Surgery      |
| 195 Female | 52 /                      |   | / | Surgery      |
| 196 Male   | 59 /                      | / | / | Surgery      |
| 197 Female | 79 /                      | ✓ | / | Surgery      |
| 198 Female | 77 /                      | ✓ | / | Surgery      |
| 199 Female | 74 /                      | ✓ | / | /            |

|            |      |   |   |                    |
|------------|------|---|---|--------------------|
| 200 Female | 77 / | ✓ | / | Surgery            |
| 201 Female | 75 / | ✓ | / | /                  |
| 202 Female | 84 / | ✓ | / | Surgery            |
| 203 Female | 69 / | ✓ | / | Surgery            |
| 204 Female | 60 / | ✓ | / | Surgery            |
| 205 Female | 87 / | ✓ | / | Surgery            |
| 206 Male   | 59 / | / | / | Surgery            |
| 207 Female | 55 / |   | / | Surgery            |
| 208 Female | 90 / | ✓ | / | /                  |
| 209 Female | 69 / | ✓ | / | Surgery            |
| 210 Female | 72 / | ✓ | / | /                  |
| 211 Female | 83 / | ✓ | / | Surgery            |
| 212 Female | 67 / | ✓ | / | /                  |
| 213 Female | 74 / | ✓ | / | Surgery            |
| 214 Female | 73 / | ✓ | / | /                  |
| 215 Female | 55 / |   | / | Surgery            |
| 216 Female | 65 / | ✓ | / | Surgery            |
| 217 Female | 69 / | ✓ | / | Surgery            |
| 218 Male   | 73 / | / | / | Surgery            |
| 219 Female | 63 / | ✓ | / | Surgery            |
| 220 Female | 69 / | ✓ | / | /                  |
| 221 Female | 62 / | ✓ | / | Surgery            |
| 222 Male   | 52 / | / | / | Surgery            |
| 223 Female | 75 / | ✓ | / | Surgery            |
| 224 Female | 53 / |   | / | Surgery            |
| 225 Male   | 74 / | / | / | Surgery            |
| 226 Female | 83 / | ✓ | / | Surgery            |
| 227 Female | 70 / | ✓ | / | Surgery            |
| 228 Female | 77 / | ✓ | / | Surgery            |
| 229 Male   | 60 / | / | / | Surgery            |
| 230 Male   | 70 / | / | / | Surgery            |
| 231 Female | 70 / | ✓ | / | Surgery            |
| 232 Male   | 71 / | / | / | Surgery            |
| 233 Female | 76 / | ✓ | / | /                  |
| 234 Female | 69 / | ✓ | / | Chemotherapy       |
| 235 Female | 73 / | ✓ | / | /                  |
| 236 Female | 76 / | ✓ | / | Radiotherapy       |
| 237 Female | 75 / | ✓ | / | /                  |
| 238 Female | 77 / | ✓ | / | Surgery            |
| 239 Female | 74 / | ✓ | / | /                  |
| 240 Female | 65 / | ✓ | / | Chemo/Radiotherapy |
| 241 Female | 81 / | ✓ | / | /                  |
| 242 Female | 76 / | ✓ | / | Surgery            |
| 243 Female | 48 / |   | / | Surgery            |
| 244 Female | 76 / | ✓ | / | Surgery            |
| 245 Female | 65 / | ✓ | / | Chemo/Radiotherapy |
| 246 Female | 67 / | ✓ | / | Surgery            |
| 247 Female | 83 / | ✓ | / | Surgery            |
| 248 Female | 68 / | ✓ | / | /                  |
| 249 Female | 79 / | ✓ | / | Surgery            |

250 Female 71 /

✓ /

Surgery

/: Unkown or lost to follow up DES: Diethylstilbestrol
